# Supplementary material
Source: Springer Nature journal article supplement (https://www.springermedizin.de/resource/supplementary/12875_2010_536_MOESM5_ESM.pdf/9434890)
Supplement: MOESM5 [file 9434890]

**Table 5: How important are the following indicators in helping you to improve your individual overall job performance.**

| <b>Indicator<br/>(Not Important=1 to Very Important=5)</b>          | <b>MDs</b> | <b>Nursing +NP</b> | <b>Allied Health<br/>Professionals</b> | <b>Administrative</b> |
|---------------------------------------------------------------------|------------|--------------------|----------------------------------------|-----------------------|
| Number of patients seen                                             | 3.7 ± 0.9  | 3.3 ± 1.3          | 3.0 ± 1.4                              | 3.1 ± 1.6             |
| Patients' satisfaction with interactions with you                   | 4.6 ± 0.6  | 4.2 ± 0.9          | 4.6 ± 0.8                              | 3.8 ± 1.4             |
| Team's satisfaction with their interactions with you                | 4.5 ± 0.8  | 4.3 ± 0.8          | 4.5 ± 0.9                              | 4.0 ± 1.1             |
| Number of patients referred from other providers                    | 2.4 ± 1.2  | 3.2 ± 1.2          | 3.6 ± 1.4                              | 2.1 ± 1.1             |
| Preventive health manoeuvres performed or omitted                   | 4.7 ± 0.6  | 4.2 ± 1.0          | 3.1 ± 1.6                              | 3.4 ± 1.6             |
| The time to the next available appointment for a patient to see you | 4.0 ± 1.0  | 3.6 ± 1.3          | 2.9 ± 1.3                              | 2.8 ± 1.8             |
